# Supplementary material for: Assessing Radish Health during Space Cultivation by Gene Transcription
Source: MDPI journal article supplement (doi:10.3390/plants12193458), 2023-09-30
Supplement: s1 [file s1]

Assessing radish health during space cultivation by gene transcription.

Supplemental information:

Table S1: Select, verified primer sequences for *R. sativus* used to assess transcription data during space flight and ground control.

| Accession # | Description                     | Primers<br>Sequence (5' - 3') |                        | Start | Stop | Amplicon<br>Length | Efficiency<br>% |
|-------------|---------------------------------|-------------------------------|------------------------|-------|------|--------------------|-----------------|
| AB042186.1  | myrosinase<br>activity          | F                             | TCAAGAACCCTGCGAAAC     | 1576  | 1594 | 127                | 101             |
|             |                                 | R                             | AGGAAGTGTGAGAGACATAGA  | 1682  | 1703 |                    |                 |
| AB747087.1  | Chlorophyll-<br>binding protein | F                             | GCAGGAGCACACACTTAC     | 457   | 475  | 111                | 89              |
|             |                                 | R                             | GGTCTTAGCCTCATCATTGG   | 548   | 568  |                    |                 |
| KF682449.1  | Glucosinolate<br>synthesis      | F                             | AGCAGAAGTGAGGGAGTAT    | 981   | 1000 | 89                 | 89              |
|             |                                 | R                             | CTAAGGCTCTGAAGTAAGGAAG | 1048  | 1070 |                    |                 |
| EU369394.1  | Peroxidase<br>precursor         | F                             | GGAAGTCAAGGCGAGATAAG   | 874   | 894  | 86                 | 94              |
|             |                                 | R                             | CTCACAACACCATCATCCTC   | 940   | 960  |                    |                 |
| M63843.1    | Napin storage<br>protein        | F                             | TGAGCCGTATCTACCAGAC    | 423   | 441  | 64                 | 100             |
|             |                                 | R                             | ATGCTAACTTGCGGGATTC    | 468   | 486  |                    |                 |
| AT5G09810.1 | Actin 7                         | F                             | AGCTTCGTGTTGCACCTGAA   | 456   | 476  | 120                | 104.3           |
|             |                                 | R                             | ACATGGCAGGGACATTGAATG  | 555   | 576  |                    |                 |
| Z24738.1    | Ubiquitin1                      | F                             | GGAGAGCAGTGACACCATCGA  | 81    | 103  | 120                | 103.8           |
|             |                                 | R                             | GCCAAGGTACGACCATCTTCA  | 180   | 201  |                    |                 |

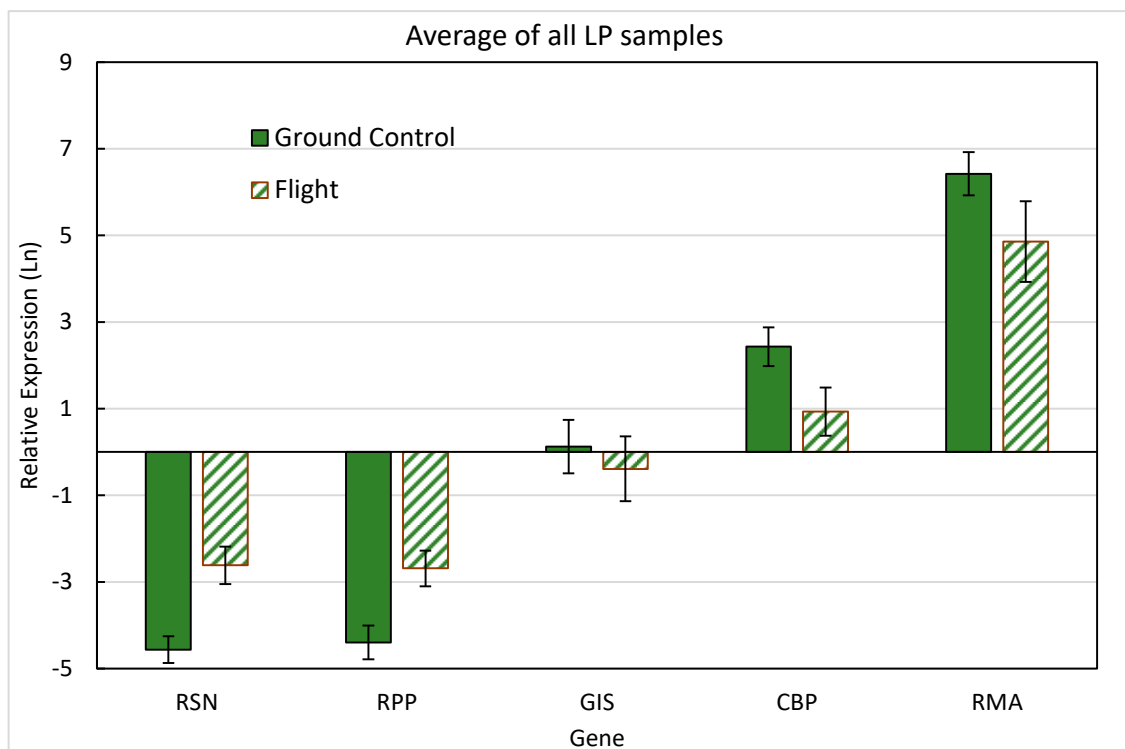

Figure S1: Average transcription of genes during two space flights and a corresponding ground control. The data represent the average of eight leaf punch samples  $\pm$  SE and are shown relative to ACT7 and UBQ1 that were collected on day 10, 18 and 24 of a 27-day cultivation period of *R. sativus*, cultivar Cherry Belle.

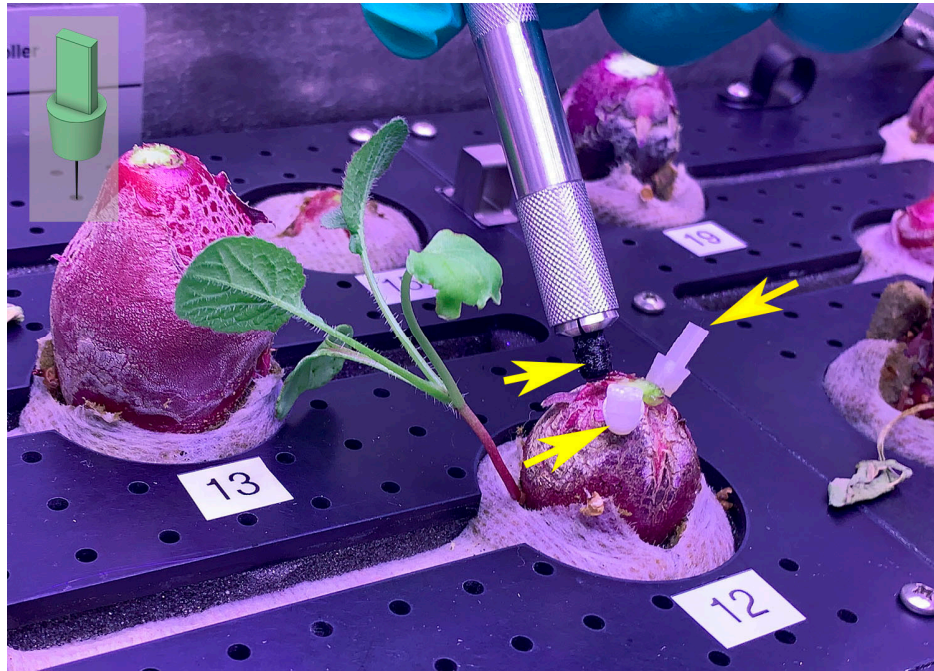

Figure S2: SPGE sampling of radish bulbs showing the holder used to insert the probes into the tissue (arrows). The insert shows a detailed sketch of the holder and probe. Sampling was done on day 27 after imbibition at the Kennedy Space Center and the second grow-out on the ISS.
